# Supplementary material for: The Role of Behavioral Friction for Patients and Clinicians in a Text-Based Home Blood Pressure Monitoring Program: A Realist Evaluation
Source: Research Square preprint supplement (doi:10.21203/rs.3.rs-9569560/v1), 2026-06-09
Supplement: Supplementary file 1 [file 75fdb3d4d1fabf1cb8915577.docx]

**Patient** Semi-Structured Interview Guide

**Introduction**

***Coordinator says****: “Hi my name is (------) and I am a Health Project Coordinator with Highland Family Medicine Research working on the home blood pressure monitor study. We are interested in your experience with home blood pressure monitoring.* ***We want to learn from you, whether it has worked and why.”***

**Questions for patients who confirm their use of home BP monitoring**

1. **Did your doctor or provider invite you to participate in home blood pressure monitoring where a blood pressure device was or would be shipped to your home?**
2. **If not, do think you would be willing to take your blood pressure using a blood pressure cuff that automatically sends your blood pressure readings to your provider? Why (or not)? [Only ask those who answered “No” to question #1]**
3. **If yes, did you agree? Why (or not)?**

**Questions for patients that participated in home BP monitoring [Only ask the following questions those who answered “Yes” to question #3]**

1. **We are interested in your overall experience in using this device. What was your overall experience like with using your home BP monitor? Did you find it worthwhile for you? Please explain.**
2. **Did you receive a phone call from a nurse from Optimize Health to help you get set up? Was this helpful or not? Please explain.**
3. **How easy or hard is the equipment to use? Please explain.**
4. **How long did it take you to take your blood pressure? How often did you use it?**
5. **Were you successful in sending readings as far as you know? Please tell us more. If not, what happened? Was the nurse from Optimize Health able to help you? Please explain.**
6. **Did an HFM provider or pharmacist contact you about your readings? How did you communicate with her/him? By phone? By MyChart? Other ways (describe)? Did your provider suggest changes in medications? Did you make these changes? Did they suggest changes in your diet or lifestyle? If so which ones? Did you make these changes?**
7. **Would you recommend HBPM to other patients? Please explain.**
8. **Did you find taking your blood pressure to be a hassle for you? Which parts? Why or why not?**
9. **What could we do to make the process easier for you?**
10. **Did you take your measurements the entire time you had the device or did you stop?**

**Questions for patients who stopped the use of at home BP monitoring? [ Only ask the following questions for those that answered “stopped” to question # 10]**

1. **In general, what made you decide to stop using your BP monitor? Please explain.**
2. **What did you find to be the most difficult for you? The process, communication with vendor or provider? Please explain.**
3. **Is there anything we can do to make the experience or process easier for you and more worthwhile? Please explain**

***Coordinator says****:* **“***We appreciate as much information and feedback that you are willing to share with us as this will be helping us improve the program for implementing and sustaining team-based home blood pressure monitoring within primary care.* ***What other suggestions do you have for us about helping you take your blood pressure and informing your provider about the BP readings?”***
